# Supplementary material for: Multiple Reaction Monitoring-Based Targeted Assays for the Validation of Protein Biomarkers in Brain Tumors
Source: PubMed Central journal article supplement (PMC8162214; doi:10.3389/fonc.2021.548243), 2021-05-14
Supplement: Image_1.pdf [file Image_1.pdf]

# Supplementary Figure 1

## MS parameters

### Method Summary

### Method Settings

Method Duration (min): **10**

### Global Parameters

#### Ion Source

Ion Source Type: **H-ESI**  
Spray Voltage: **Static**  
Positive Ion (V): **3500**  
Negative Ion (V): **2500**  
Current LC Flow ( $\mu\text{L}/\text{min}$ ): **0**  
Sheath Gas (Arb): **45**  
Aux Gas (Arb): **10**  
Sweep Gas (Arb): **1**  
Ion Transfer Tube Temp ( $^{\circ}\text{C}$ ): **300**  
Vaporizer Temp ( $^{\circ}\text{C}$ ): **350**  
APPI Lamp: **Not in Use**

### Experiment 1

Start Time (min): **0**  
End Time (min): **10**

#### Master Scan:

#### SRM

Use Cycle Time: **True**  
Cycle Time (sec): **2**  
Use Calibrated RF Lens: **True**  
Q1 Resolution (FWHM): **0.7**  
Q3 Resolution (FWHM): **0.7**  
CID Gas (mTorr): **2.5**  
Source Fragmentation (V): **0**  
Chromatographic Peak Width (sec): **15**  
Use Chromatographic Filter: **False**  
Use Retention Time Reference: **False**  
Display Retention Time: **False**  
Use Quan Ion: **False**  
Show Visualization: **False**

#### SRM Table
