# Supplementary material for: Multiple Reaction Monitoring-Based Targeted Assays for the Validation of Protein Biomarkers in Brain Tumors
Source: PubMed Central journal article supplement (PMC8162214; doi:10.3389/fonc.2021.548243), 2021-05-14
Supplement: Image_2.pdf [file Image_2.pdf]

## Supplementary Figure 2A

### Vitronectin (Meningioma CSF)

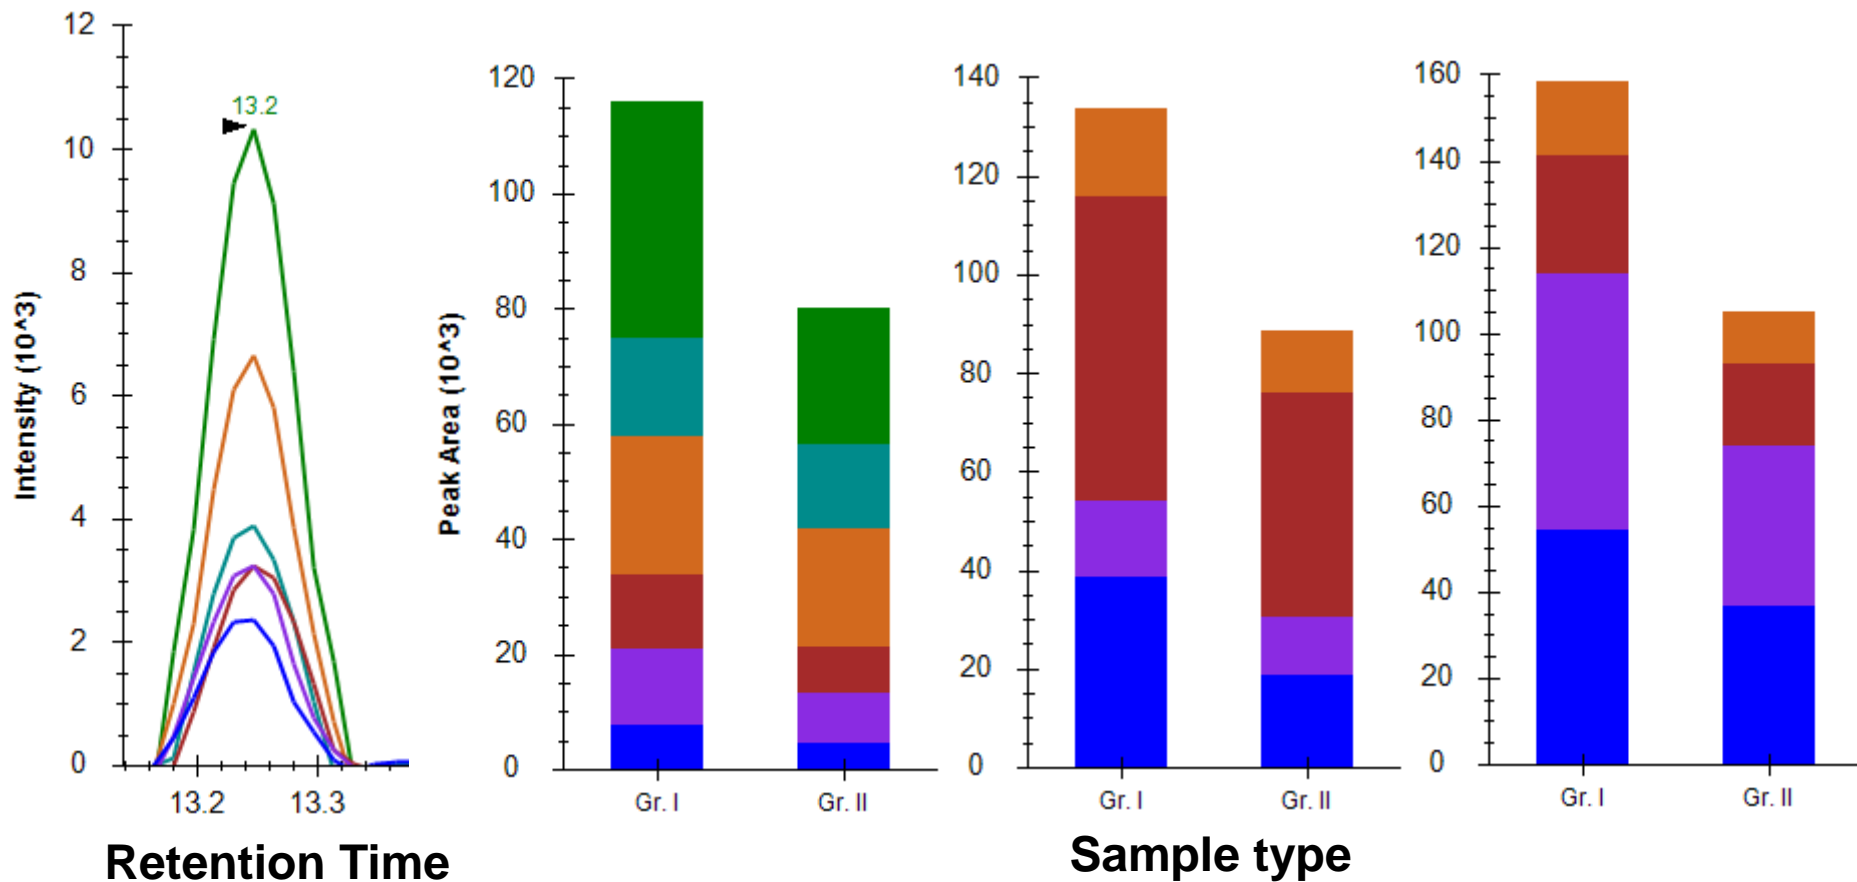

Representative MRM peak and bar graphs for SIAQYWLGCAPAGHL, FEDGVLDPDYPR and DVWGIEGPIDAAFTR of Vitronectin respectively, showing overexpression in Grade I as compared to Grade II.

## Supplementary Figure 2A

### Complement C3 (Meningioma CSF)

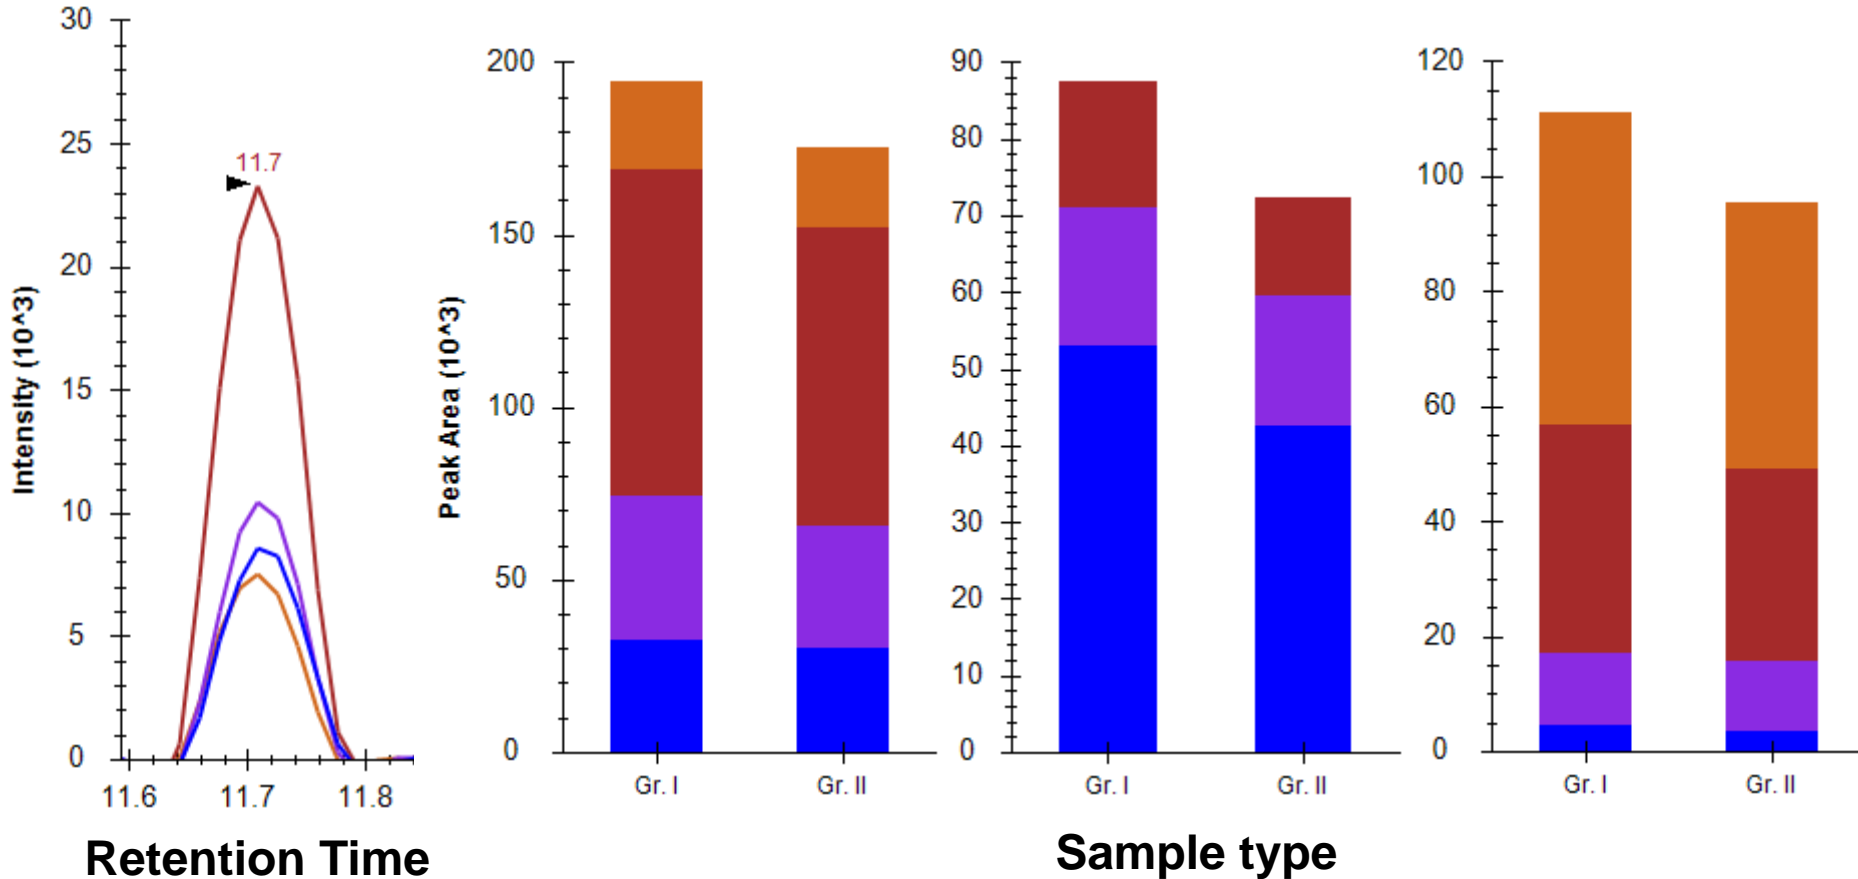

Representative MRM peak and bar graphs for LVAYYTLIGASGQR, TGLQEVEVK and SGSDEVQVGQQR of Complement C3 respectively, showing overexpression in Grade I as compared to Grade II.

## Supplementary Figure 2A

### Apolipoprotein A1 (Meningioma CSF)

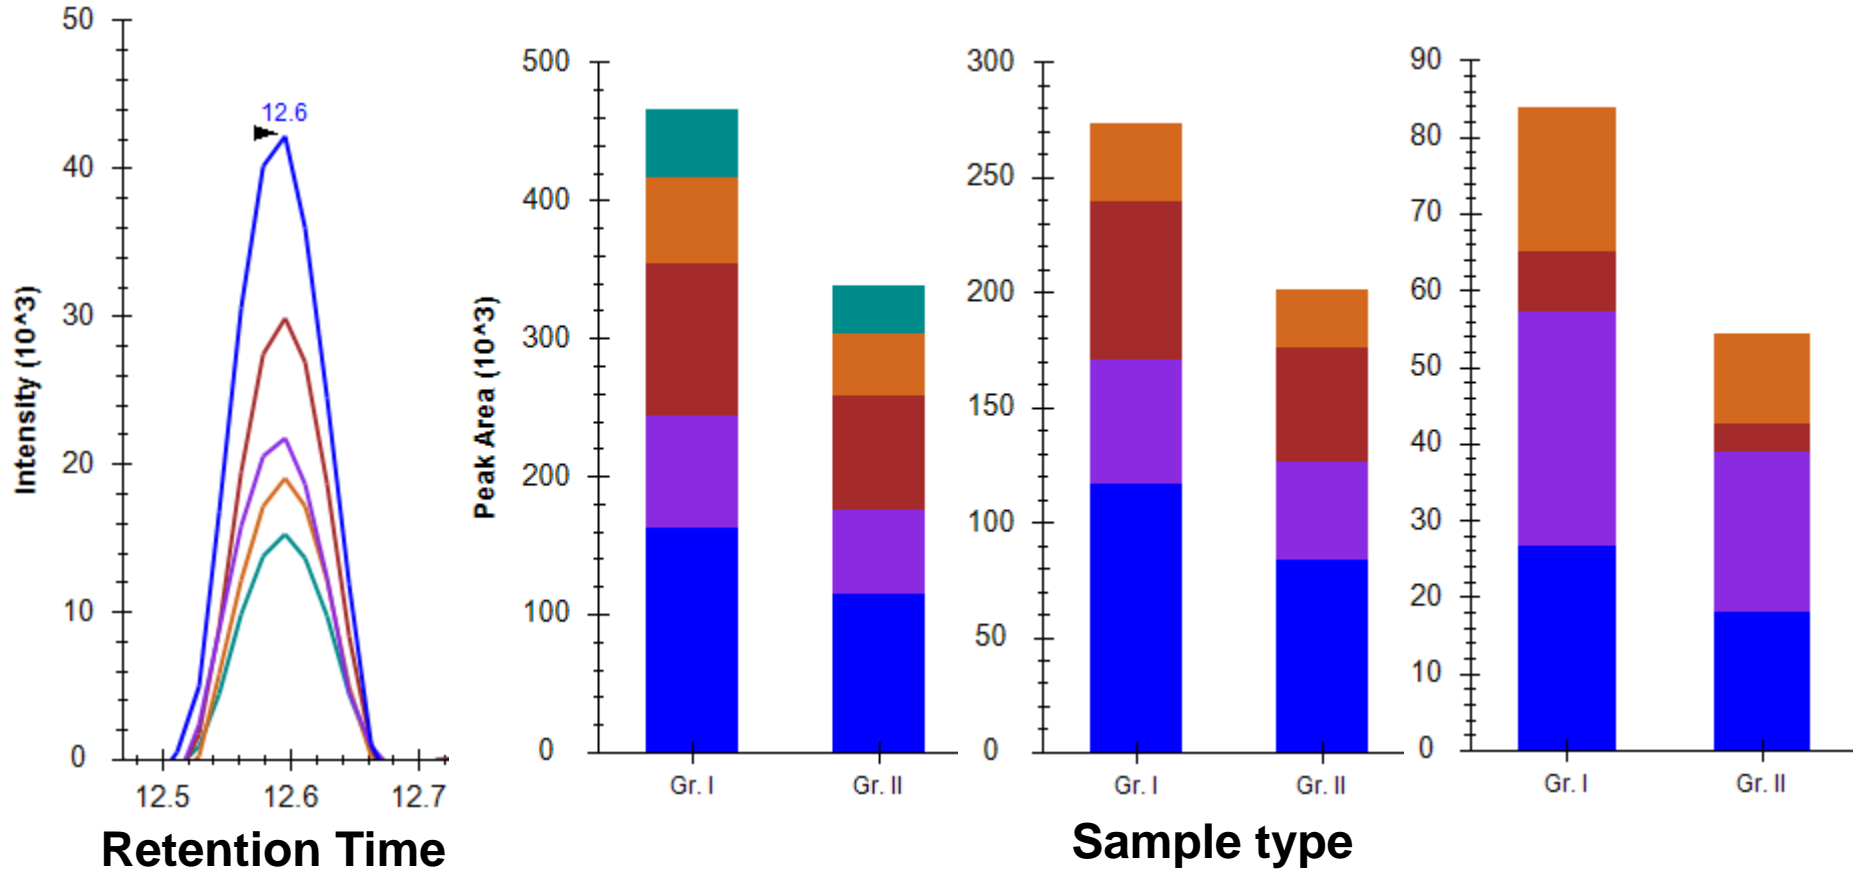

Representative MRM peak and bar graphs for LLDNWDSVTSTFSK, DYVSQFEGSALGK and ATEHLSTLSEK of Apolipoprotein A1 respectively, showing overexpression in Grade I as compared to Grade II.

## Supplementary Figure 2B

### Prostaglandin-H2 D-isomerase (Glioma CSF)

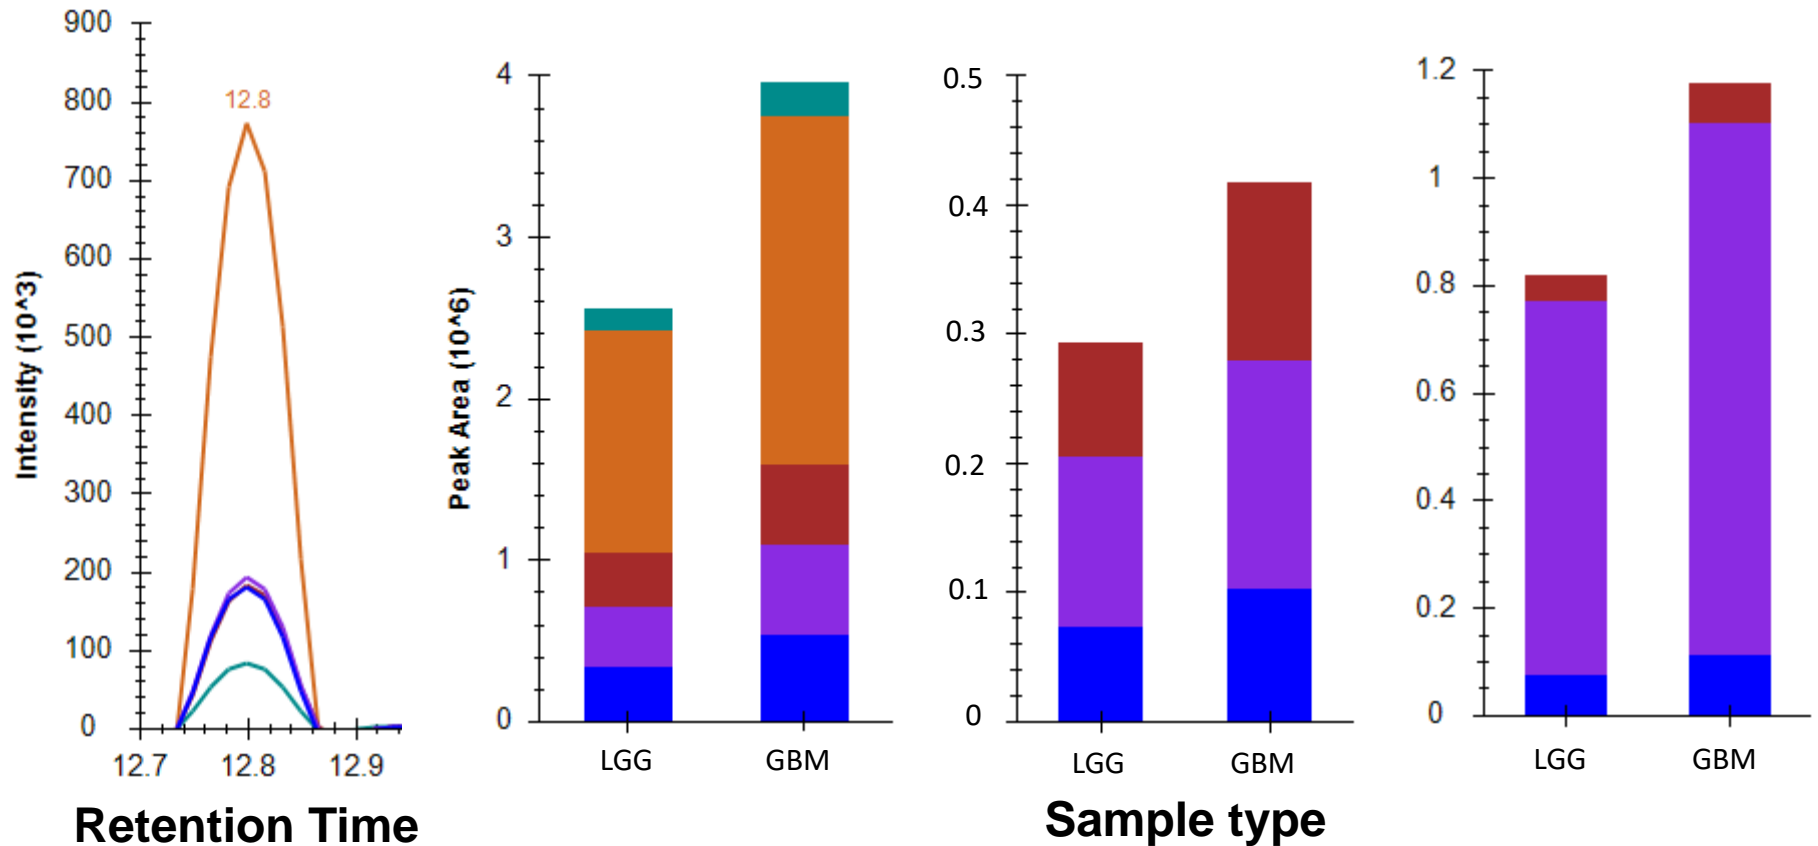

Representative MRM peak and bar graphs for TMLLQPAGSLGSYSYR, WFSAGLASNSSWLR and AQQFTEDTIVFLPQTDK of PTGDS respectively, showing overexpression in GBM as compared to LGG.

## Supplementary Figure 2B

### Vitronectin (Glioma CSF)

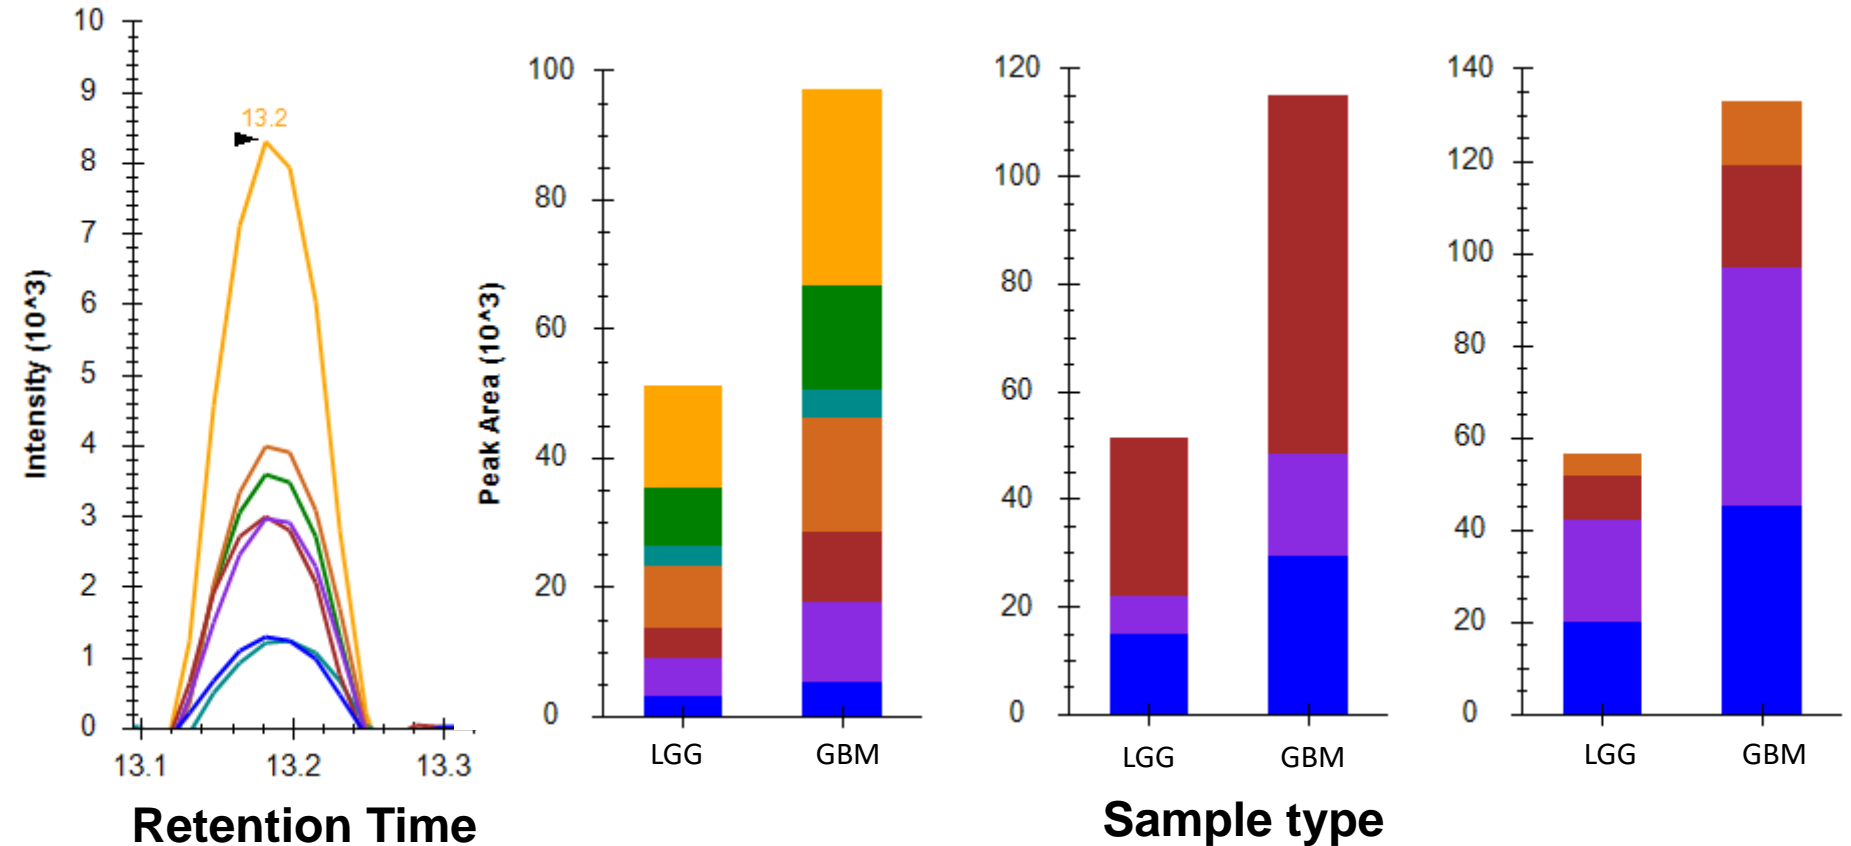

Representative MRM peak and bar graphs for SIAQYWLGC P APGHL, FEDGVLD P DYPR and DVWGIEGPIDAA FTR of Vitronectin respectively, showing overexpression in GBM as compared to LGG.

## Supplementary Figure 2B

### Complement C3 (Glioma CSF)

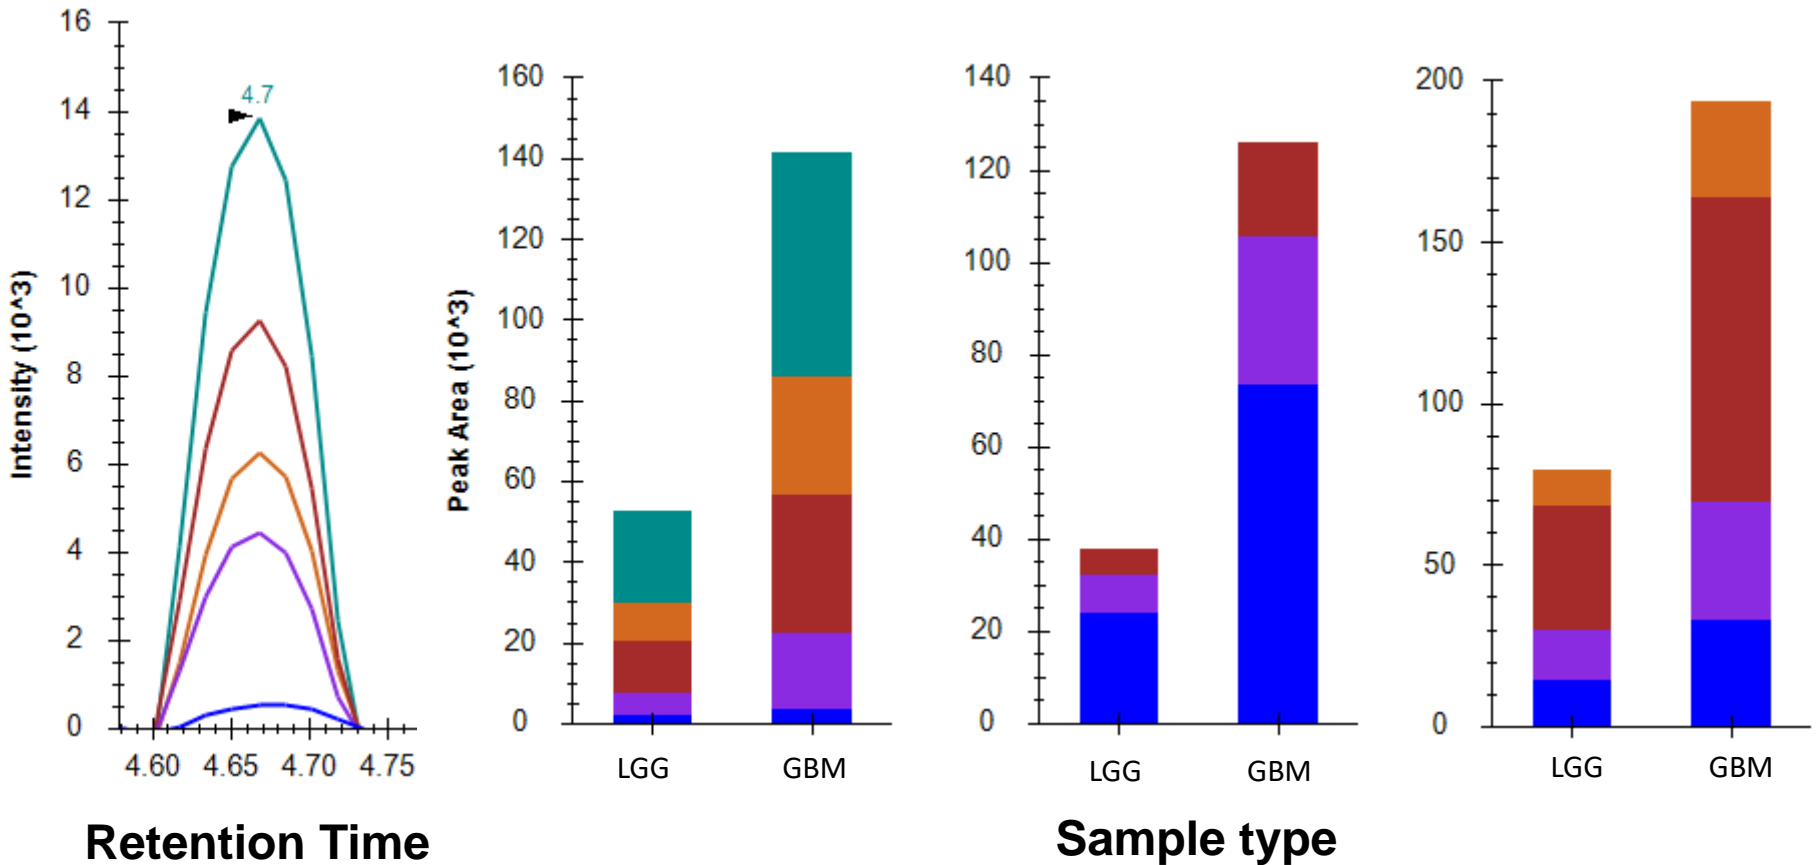

Representative MRM peak and bar graphs for SGSDEVQVGQQR, TGLQEVEVK and LVAYYTLIGASGQR of Complement C3 respectively, showing overexpression in GBM as compared to LGG.
