# Supplementary material for: Multiple Reaction Monitoring-Based Targeted Assays for the Validation of Protein Biomarkers in Brain Tumors
Source: PubMed Central journal article supplement (PMC8162214; doi:10.3389/fonc.2021.548243), 2021-05-14
Supplement: Image_3.pdf [file Image_3.pdf]

## Supplementary Figure 3A

### Cystatin-C (Meningioma)

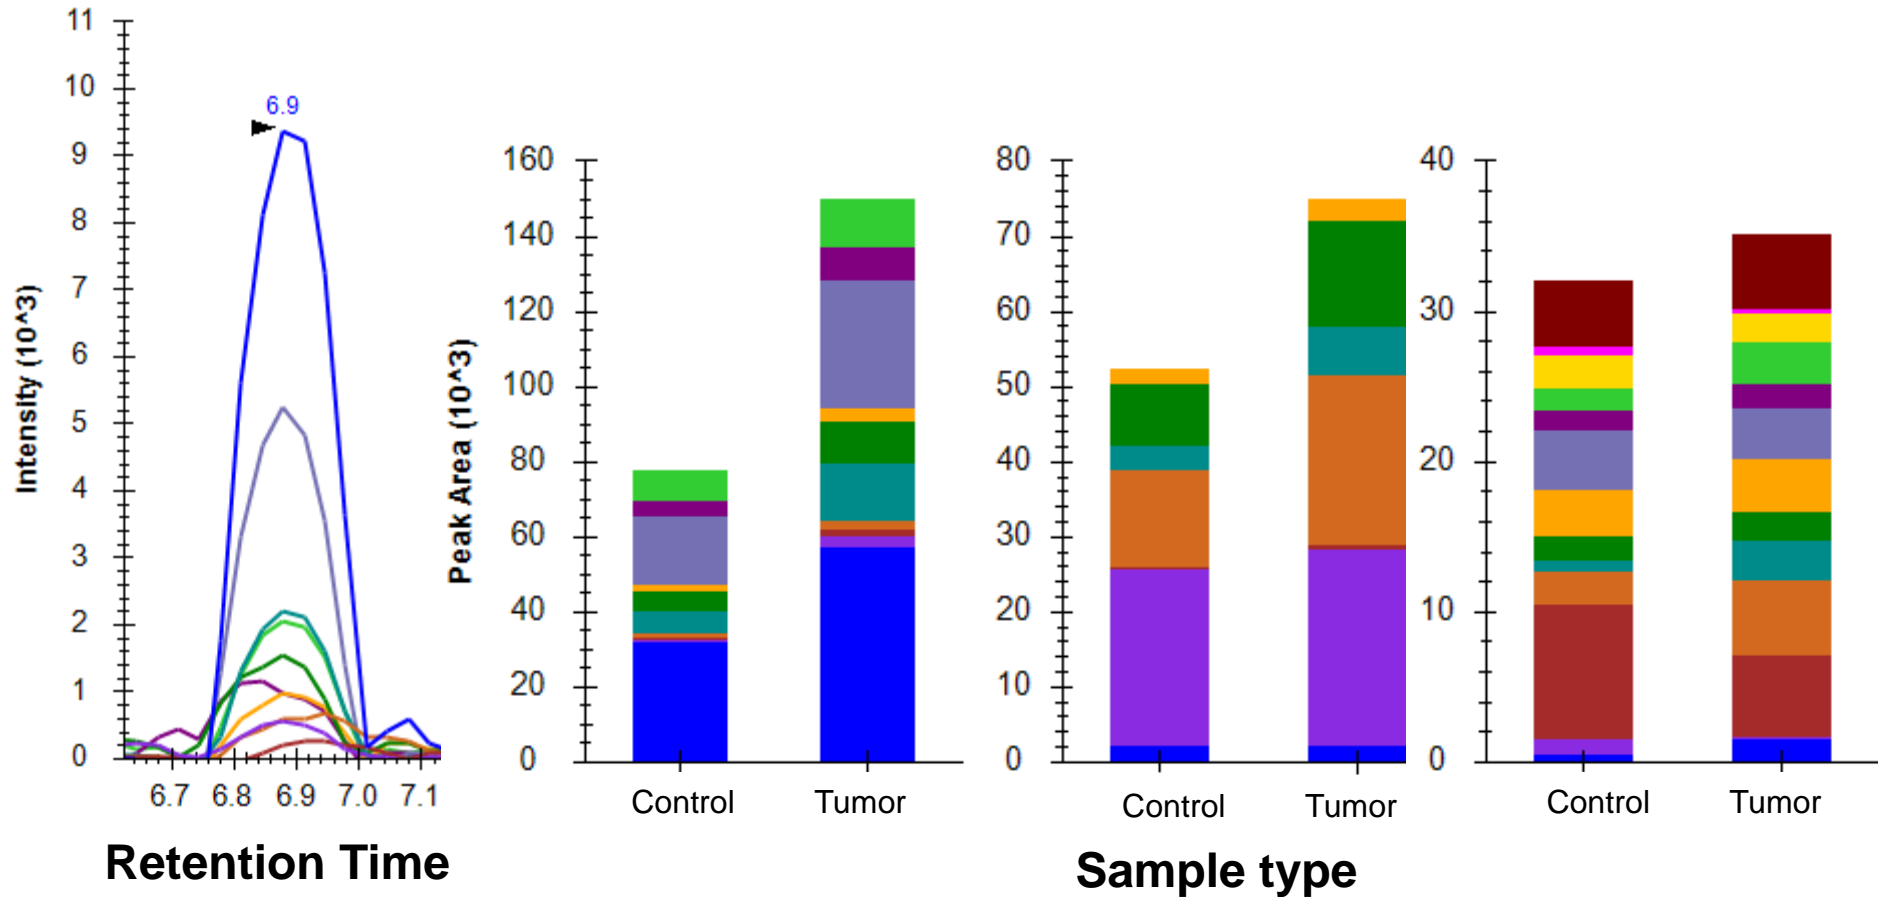

Representative MRM peak and bar graphs for LVGGPMDASVEEEGVR, QIVAGVNYFLDVELGR and TQPNDNCPFHDQPHLK of Cystatin-C respectively, showing overexpression in tumor as compared to controls.

# Supplementary Figure 3A

## Vimentin (Meningioma)

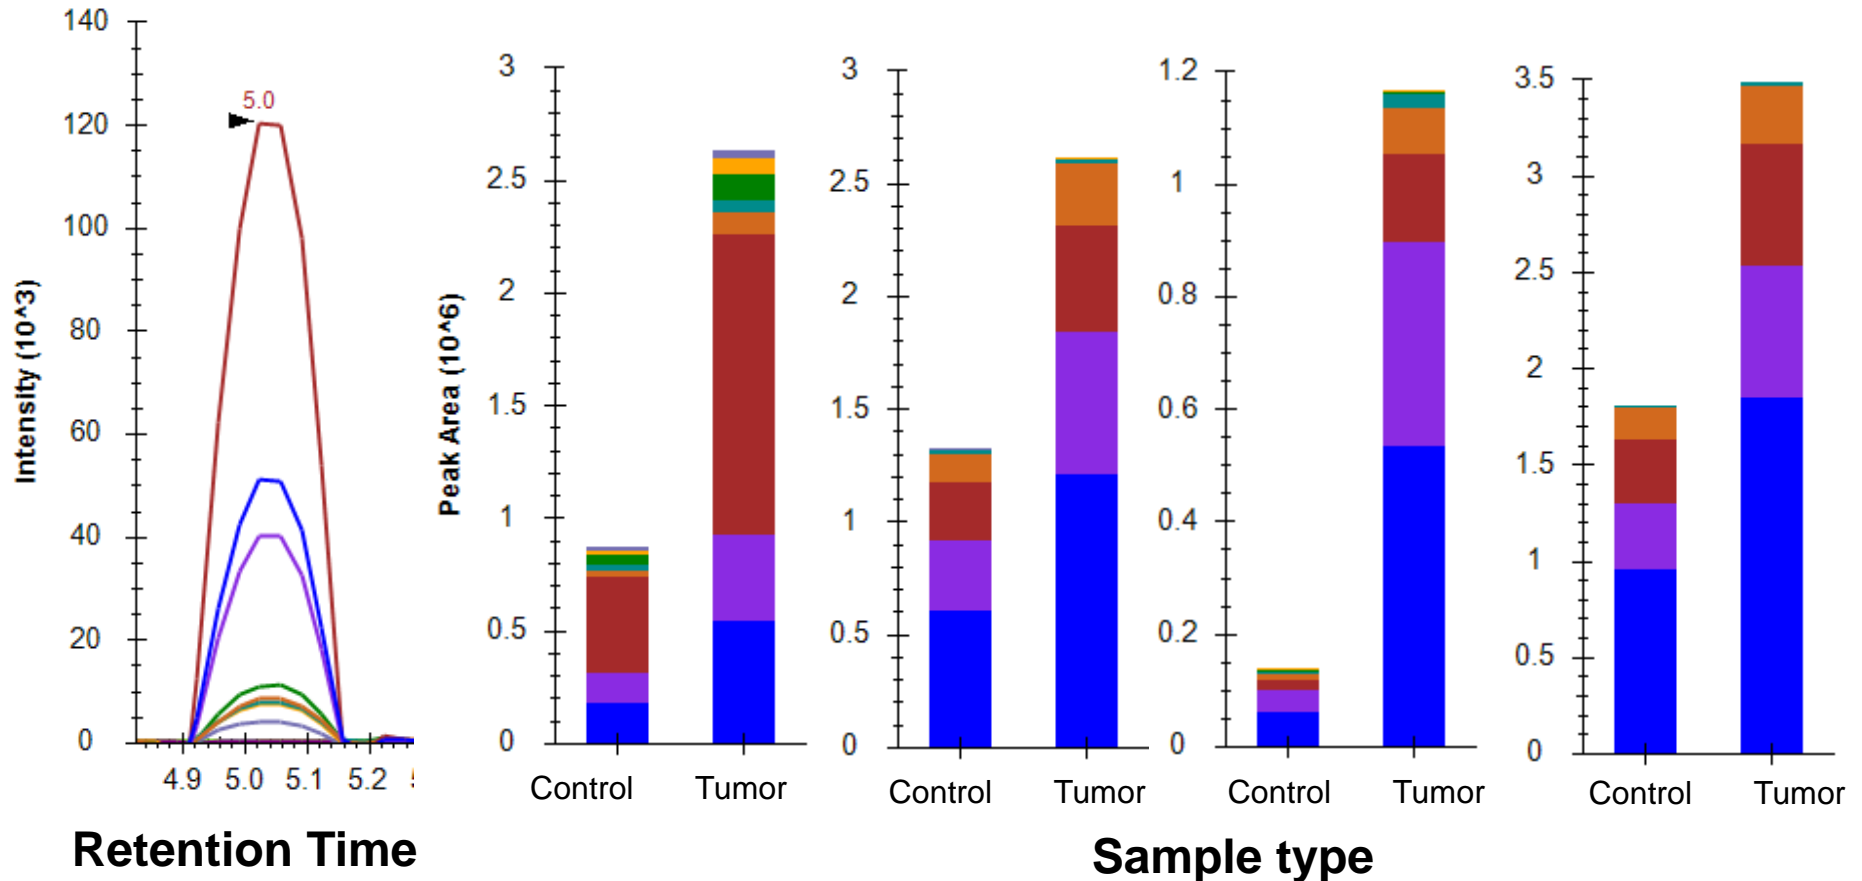

Representative MRM peak and bar graphs for SLYASSPGGVYATR, ILLAELEQLK, LGDLYEEEMR and FADLSEAANR of Vimentin respectively, showing overexpression in tumor as compared to controls.

## Supplementary Figure 3B

### Annexin A1 (Glioma)

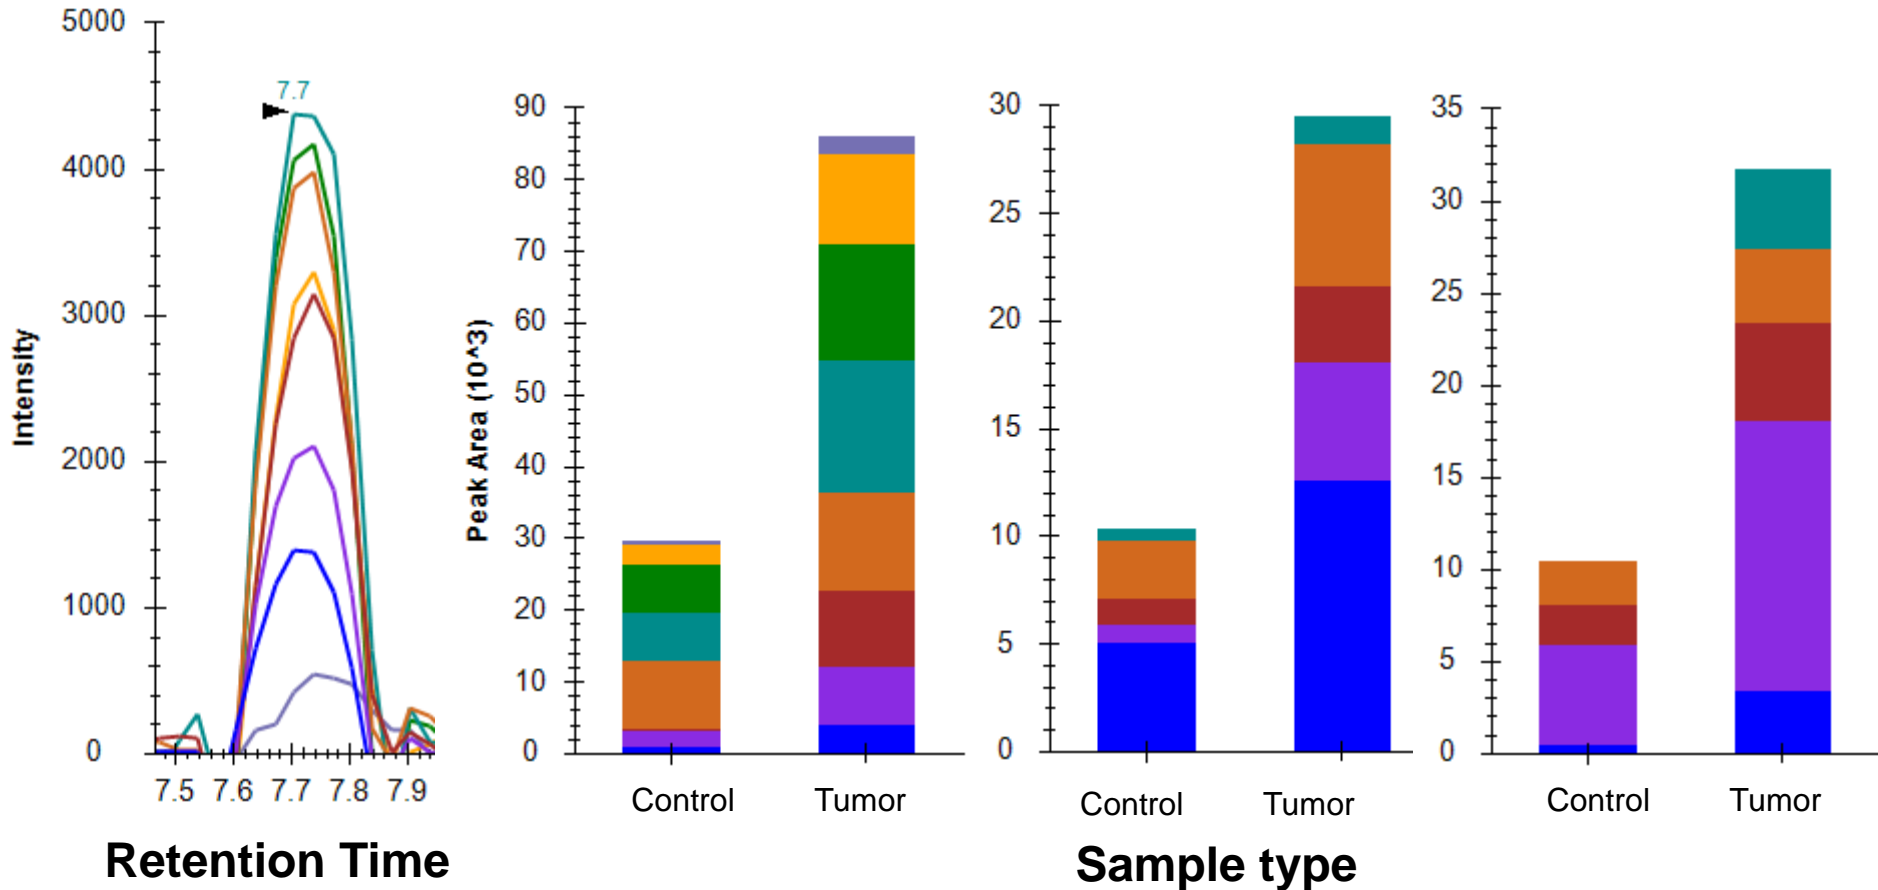

Representative MRM peak and bar graphs for GLGTDEDTLIEILASR, GVDEATIIDILTK and GTDVNVFNTILTTR of Annexin A1 respectively, showing overexpression in tumor as compared to controls.

# Supplementary Figure 3B

## Vimentin (Glioma)

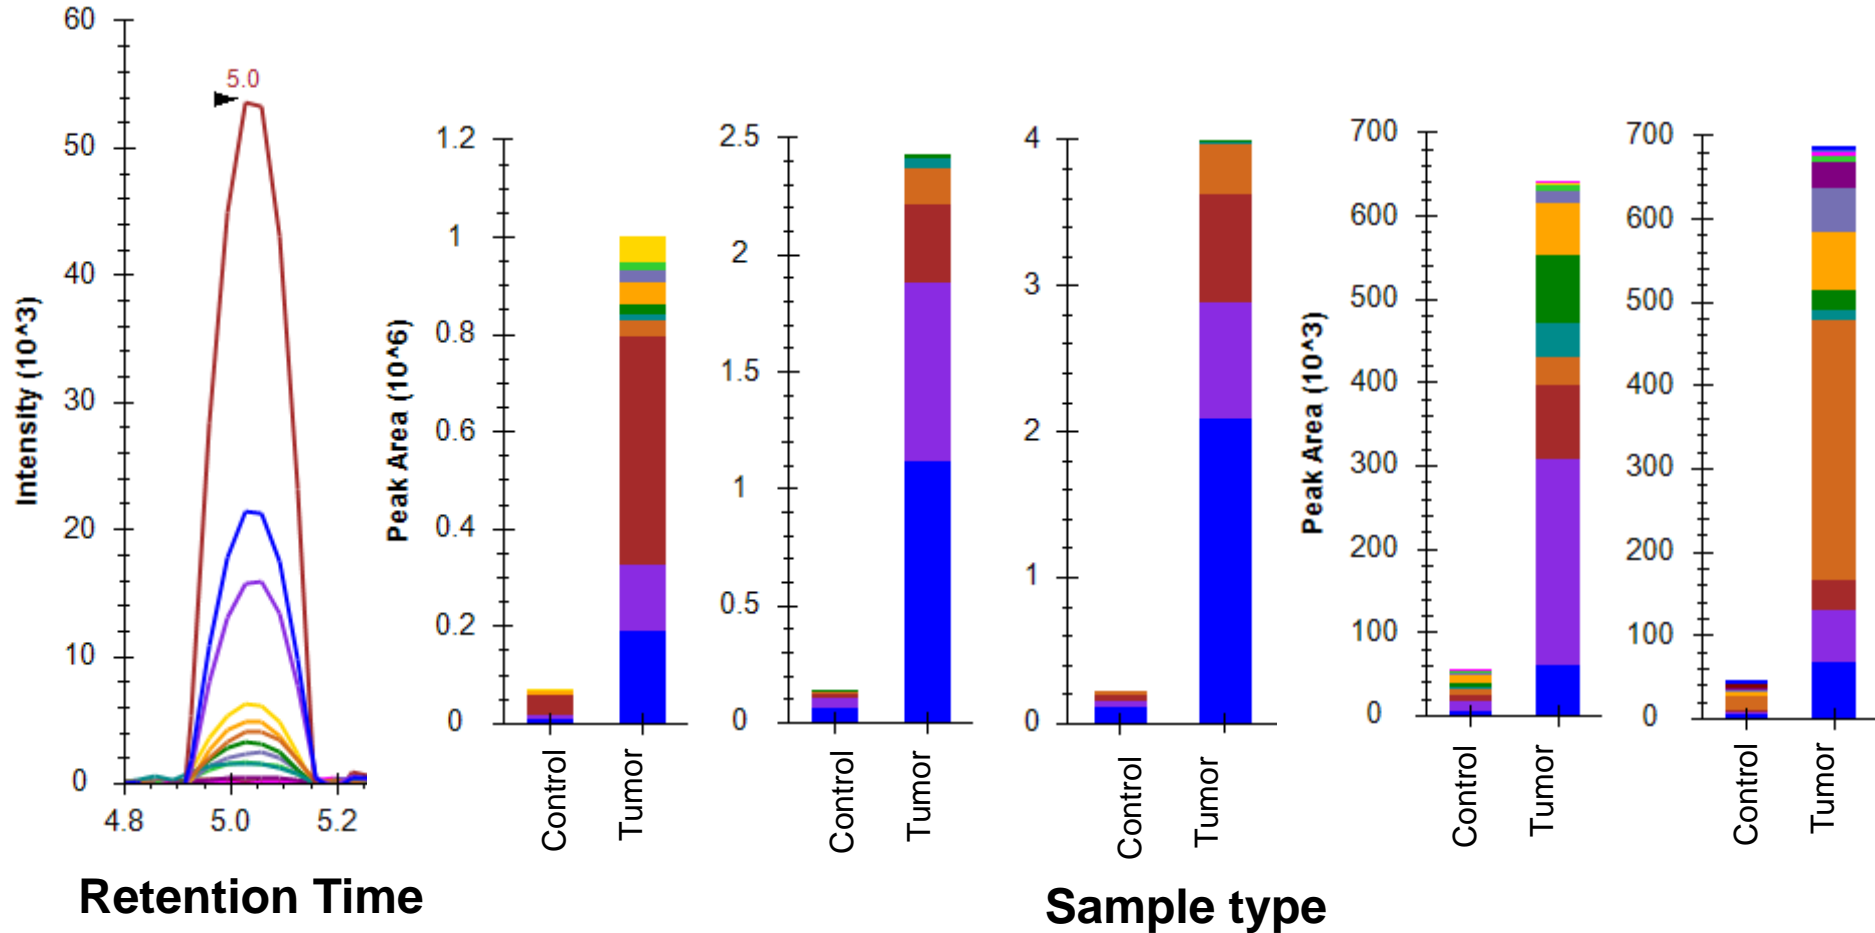

Representative MRM peak and bar graphs for SLYASSPGGVYATR, ILLAELEQLK, LGDLYEEEMR, FADLSEAANR, QVQSLTCEVDALK and ETNLDSLPLVDTHSK of Vimentin respectively, showing overexpression in tumor as compared to controls.
