# Supplementary material for: Multiple Reaction Monitoring-Based Targeted Assays for the Validation of Protein Biomarkers in Brain Tumors
Source: Front Oncol. 2021 May 14;11:548243. doi: 10.3389/fonc.2021.548243 (PMC8162214; doi:10.3389/fonc.2021.548243)
Supplement: Supplementary file 4 [file Table_1.xlsx]

## Sheet: Meningioma_CSF
Sample ID	Tumor Type	Sample annotation for Skyline	Age (Years)	Gender	Histopathology Report	Grade/Clinical Diagnosis
Meningioma 1	MG I	Mg I_01_01	74	Female	Meningothelial meningioma with mild atypical features	WHO grade I
Meningioma 2	MG I	Mg I_02_01	28	Male	Transitional meningioma	WHO grade I
Meningioma 3	MG I	Mg I_03_01	49	Female	Meningioma, consistent with microcystic variant	WHO grade I
Meningioma 4	MG II	Mg II_01_01	47	Male	Atypical meningioma	WHO grade II
Meningioma 5	MG II	Mg II_02_01	53	Male	Atypical meningioma	WHO grade II
Meningioma 6	MG II	Mg II_03_01	33	Male	Consistent with meningioma of transitional architecture with atypical features grade II.	WHO grade II
Meningioma 7	MG II	Mg II_05_01	81	Male	Atypical meningioma	WHO grade II

## Sheet: Glioma_CSF
Sample ID	Tumor Type	Sample annotation for Skyline	Age (Years)	Gender	HPR	1p 19q FISH	IDHR132H (IHC)	IDHR132H (Sequencing)	Final Status IDHR132H	Grade	Revised diagnosis (WHO 2016)
Glioma 1	GBM	GBM 01_01	64	Male	GBM	ND	Negative	ND	NC (Mostly IDH Wild type)	IV	GBM, NOS
Glioma 2	GBM	GBM 02_01	37	Male	GBM	ND	Negative	ND	NC (Mostly IDH Wild type)	IV	GBM, NOS
Glioma 3	GBM	GBM 03_01	47	Male	GBM	ND	Negative	Wild type	Wild type	IV	GBM, IDH wt
Glioma 4	GBM	GBM 04_01	52	Male	GBM	ND	Negative	ND	NC (Mostly IDH Wild type)	IV	GBM, NOS
Glioma 5	GBM	GBM 05_01	50	Female	GBM	ND	Negative	ND	NC (Mostly IDH Wild type)	IV	GBM, NOS
Glioma 6	GR II	Gr II_02_01	47	Male	Astrocytoma (GII)	Non-deleted	positive (Mutant)	mutant	mutant	II	Diffuse astrocytoma, IDH mutant
Glioma 7	GR III	Gr III_02_01	35	Male	AOA (GIII)	Non-Deleted	Positive (Mutant)	Mutant	Mutant	III	ODG- A, NOS, IDH mutant
Glioma 8	GR III	Gr III_03_01	23	Female	AOA (GIII)	Non-deleted	positive (Mutant)	mutant	mutant	III	AA, IDH mutant
Glioma 9	GR III	Gr III_04_01	29	Male	AA (GIII)	ND	Positive (Mutant)	ND	Mutant	III	AA, IDH mutant
Glioma 10	GR III	Gr III_05_01	48	Male	AA (GIII)	ND	Negative	Mutant (ATRX retained)	Mutant	III	AA, IDH mutant

## Sheet: Meningioma_Tissue
Sample ID	Tumor Type	Sample annotation for Skyline	Age (years)	Gender	HPR	Grade
MG_1	Meningioma	MG1_B1	47	Female	Meningothelial meningioma (WHO grade I).	I
MG_2	Meningioma	MG2_B2	33	Male	Consistent with meningioma of transitional architecture with atypical features grade II.	II
MG_3	Meningioma	MG3_B3	50	Male	Meningothelial meningioma with atypical features (WHO grade II)	II
MG_4	Meningioma	MG4_B4	32	Female	Meningioma, WHO Grade I	I
MG_5	Meningioma	MG5_B5	46	Female	Meningioma II	II
MG_6	Meningioma	MG6_B6	57	Female	Transitional meningioma (WHO grade I)	I
Con_ARA_1	Non-Tumor	CON1_C1	6 months	Female	NA	NA
Con_ARA_2	Non-Tumor	CON2_C2	88	Male	NA	NA
Con_ARA_3	Non-Tumor	CON3_C3	85	Male	NA	NA

## Sheet: Glioma_Tissue
Sample ID	Tumor type	Sample annotation for Skyline	Age (Years)	Gender	IDH sequencing	Grade
17	Glioma	sample17	21	Male	IDH1/2 wt	Grade III
18	Glioma	sample18	42	Female	IDH1R132H; IDH2 wt	Grade III
29	Glioma	sample29	60	Male	IDH1/2 wt	GBM
35	Glioma	sample35	30	Male	IDH1R132H; IDH2 wt	GBM
37	Glioma	sample37	52	Male	IDH1/2 wt	GBM
40	Glioma	sample40	60	Male	IDH1/2 wt	GBM

## Sheet: Medulloblastoma_Tissue
Sample ID	Tumor type	Sample annotation for Skyline	Age (Years)	Gender	Molecular subgrouping	Grade
MB_G1	Medulloblastoma	MB_G1	12	Male	Group 4	IV
MB_G2	Medulloblastoma	MB_G2	10	Female	Group 4	IV
MB_G4	Medulloblastoma	MB_G4	8	Male	Group 3	IV
MB_G5	Medulloblastoma	MB_G5	3	Male	Group 3	IV
MB_S1	Medulloblastoma	MB_S1	10	Female	SHH	IV
MB_S2	Medulloblastoma	MB_S2	20	Female	SHH	IV
