# Supplementary material for: Multiple Reaction Monitoring-Based Targeted Assays for the Validation of Protein Biomarkers in Brain Tumors
Source: Front Oncol. 2021 May 14;11:548243. doi: 10.3389/fonc.2021.548243 (PMC8162214; doi:10.3389/fonc.2021.548243)
Supplement: Supplementary file 5 [file Table_2.xlsx]

## Sheet: Sheet1
20-min gradient (for CSF samples)
S. No.	Time (min)	Flow (ml/min)	%A (0.1% FA)	%B (80% ACN 0.1% FA)
1	0	Stop run
2	0	0.4	98	2
3	16	0.4	55	45
4	17	0.4	5	95
5	18	0.4	5	95
6	19	0.4	95	5
7	20	0.4	95	5
8	20	Stop run
10-min gradient (for tissue samples)
S. No.	Time (min)	Flow (ml/min)	%A (0.1% FA)	%B (80% ACN 0.1% FA)
1	0	Stop run
2	0	0.45	95	2
3	6	0.45	55	45
4	6.5	0.45	5	95
5	7	0.45	5	95
6	7.5	0.45	95	2
7	10	0.45	95	2
8	10	Stop run
