# Supplementary material for: Multiple Reaction Monitoring-Based Targeted Assays for the Validation of Protein Biomarkers in Brain Tumors
Source: Front Oncol. 2021 May 14;11:548243. doi: 10.3389/fonc.2021.548243 (PMC8162214; doi:10.3389/fonc.2021.548243)
Supplement: Supplementary file 6 [file Table_3.xlsx]

## Sheet: Consolidated
Sample set	Protein Accession	Protein Name	Peptide
Meningioma and Glioma CSF	P41222	Prostaglandin-H2 D-isomerase	WFSAGLASNSSWLR
	P41222		TMLLQPAGSLGSYSYR
	P41222		AQGFTEDTIVFLPQTDK
	P04004	Vitronectin	DVWGIEGPIDAAFTR
	P04004		FEDGVLDPDYPR
	P04004		SIAQYWLGCPAPGHL
	P01024	Complement C3	LVAYYTLIGASGQR
	P01024		TGLQEVEVK
	P01024		SGSDEVQVGQQR
	P02647	Apolipoprotein A1	DYVSQFEGSALGK
	P02647		LLDNWDSVTSTFSK
	P02647		ATEHLSTLSEK
	P02649	Apolipoprotein E	SELEEQLTPVAEETR
	P02649		LGPLVEQGR
	P02649		AATVGSLAGQPLQER

## Sheet: Meningioma transition list
Protein Accession	Protein Gene	Peptide	Precursor	Precursor Mz	Product Mz	Transition
P41222	PTGDS	WFSAGLASNSSWLR	791.3941++	791.394	1090.56	G - y10+
P41222	PTGDS	WFSAGLASNSSWLR	791.3941++	791.394	920.458	A - y8+
P41222	PTGDS	WFSAGLASNSSWLR	791.3941++	791.394	849.421	S - y7+
P41222	PTGDS	TMLLQPAGSLGSYSYR	872.4404++	872.44	1285.62	Q - y12+
P41222	PTGDS	TMLLQPAGSLGSYSYR	872.4404++	872.44	1157.56	P - y11+
P41222	PTGDS	TMLLQPAGSLGSYSYR	872.4404++	872.44	732.331	G - y6+
P41222	PTGDS	AQGFTEDTIVFLPQTDK	955.4807++	955.481	947.52	V - y8+
P41222	PTGDS	AQGFTEDTIVFLPQTDK	955.4807++	955.481	848.451	F - y7+
P41222	PTGDS	AQGFTEDTIVFLPQTDK	955.4807++	955.481	701.383	L - y6+
P41222	PTGDS	AQGFTEDTIVFLPQTDK	955.4807++	955.481	588.299	P - y5+
P41222	PTGDS	AQGFTEDTIVFLPQTDK	955.4807++	955.481	363.187	T - y3+
P04004	VTN	DVWGIEGPIDAAFTR	823.9123++	823.912	1076.54	E - y10+
P04004	VTN	DVWGIEGPIDAAFTR	823.9123++	823.912	947.495	G - y9+
P04004	VTN	DVWGIEGPIDAAFTR	823.9123++	823.912	890.473	P - y8+
P04004	VTN	DVWGIEGPIDAAFTR	823.9123++	823.912	565.309	A - y5+
P04004	VTN	FEDGVLDPDYPR	711.8304++	711.83	875.426	L - y7+
P04004	VTN	FEDGVLDPDYPR	711.8304++	711.83	762.342	D - y6+
P04004	VTN	FEDGVLDPDYPR	711.8304++	711.83	647.315	P - y5+
P04004	VTN	FEDGVLDPDYPR	711.8304++	711.83	435.235	Y - y3+
P04004	VTN	SIAQYWLGCPAPGHL	835.4114++	835.411	1270.6	Y - y11+
P04004	VTN	SIAQYWLGCPAPGHL	835.4114++	835.411	1107.54	W - y10+
P04004	VTN	SIAQYWLGCPAPGHL	835.4114++	835.411	921.461	L - y9+
P04004	VTN	SIAQYWLGCPAPGHL	835.4114++	835.411	808.377	G - y8+
P04004	VTN	SIAQYWLGCPAPGHL	835.4114++	835.411	591.325	P - y6+
P04004	VTN	SIAQYWLGCPAPGHL	835.4114++	835.411	423.235	P - y4+
P01024	C3	LVAYYTLIGASGQR	756.4145++	756.414	1065.57	Y - y10+
P01024	C3	LVAYYTLIGASGQR	756.4145++	756.414	902.505	T - y9+
P01024	C3	LVAYYTLIGASGQR	756.4145++	756.414	575.29	G - y6+
P01024	C3	LVAYYTLIGASGQR	756.4145++	756.414	447.231	S - y4+
P01024	C3	TGLQEVEVK	501.7769++	501.777	603.335	E - y5+
P01024	C3	TGLQEVEVK	501.7769++	501.777	474.292	V - y4+
P01024	C3	TGLQEVEVK	501.7769++	501.777	375.224	E - y3+
P01024	C3	SGSDEVQVGQQR	645.3077++	645.308	943.496	E - y8+
P01024	C3	SGSDEVQVGQQR	645.3077++	645.308	814.453	V - y7+
P01024	C3	SGSDEVQVGQQR	645.3077++	645.308	715.385	Q - y6+
P01024	C3	SGSDEVQVGQQR	645.3077++	645.308	488.258	G - y4+
P02647	APOA1	DYVSQFEGSALGK	700.8383++	700.838	808.42	F - y8+
P02647	APOA1	DYVSQFEGSALGK	700.8383++	700.838	661.352	E - y7+
P02647	APOA1	DYVSQFEGSALGK	700.8383++	700.838	532.309	G - y6+
P02647	APOA1	DYVSQFEGSALGK	700.8383++	700.838	317.218	L - y3+
P02647	APOA1	LLDNWDSVTSTFSK	806.8963++	806.896	971.468	D - y9+
P02647	APOA1	LLDNWDSVTSTFSK	806.8963++	806.896	856.441	S - y8+
P02647	APOA1	LLDNWDSVTSTFSK	806.8963++	806.896	670.341	T - y6+
P02647	APOA1	LLDNWDSVTSTFSK	806.8963++	806.896	569.293	S - y5+
P02647	APOA1	LLDNWDSVTSTFSK	806.8963++	806.896	381.213	F - y3+
P02647	APOA1	ATEHLSTLSEK	608.3144++	608.314	777.435	L - y7+
P02647	APOA1	ATEHLSTLSEK	608.3144++	608.314	664.351	S - y6+
P02647	APOA1	ATEHLSTLSEK	608.3144++	608.314	577.319	T - y5+
P02647	APOA1	ATEHLSTLSEK	608.3144++	608.314	363.187	S - y3+
P02649	APOE	SELEEQLTPVAEETR	865.9258++	865.926	1272.64	E - y11+
P02649	APOE	SELEEQLTPVAEETR	865.9258++	865.926	1015.54	L - y9+
P02649	APOE	SELEEQLTPVAEETR	865.9258++	865.926	902.458	T - y8+
P02649	APOE	SELEEQLTPVAEETR	865.9258++	865.926	801.41	P - y7+
P02649	APOE	LGPLVEQGR	484.7798++	484.78	798.447	P - y7+
P02649	APOE	LGPLVEQGR	484.7798++	484.78	588.31	V - y5+
P02649	APOE	LGPLVEQGR	484.7798++	484.78	489.242	E - y4+
P02649	APOE	LGPLVEQGR	484.7798++	484.78	360.199	Q - y3+
P02649	APOE	AATVGSLAGQPLQER	749.4046++	749.405	1155.61	G - y11+
P02649	APOE	AATVGSLAGQPLQER	749.4046++	749.405	898.474	A - y8+
P02649	APOE	AATVGSLAGQPLQER	749.4046++	749.405	827.437	G - y7+
P02649	APOE	AATVGSLAGQPLQER	749.4046++	749.405	770.416	Q - y6+
P02649	APOE	AATVGSLAGQPLQER	749.4046++	749.405	642.357	P - y5+

## Sheet: Glioma transition list
Protein Accession	Protein Gene	Peptide	Precursor	Precursor Mz	Product Mz	Transition
P41222	PTGDS	WFSAGLASNSSWLR	791.3941++	791.394	1090.56	G - y10+
P41222	PTGDS	WFSAGLASNSSWLR	791.3941++	791.394	920.458	A - y8+
P41222	PTGDS	WFSAGLASNSSWLR	791.3941++	791.394	849.421	S - y7+
P41222	PTGDS	TMLLQPAGSLGSYSYR	872.4404++	872.44	1285.62	Q - y12+
P41222	PTGDS	TMLLQPAGSLGSYSYR	872.4404++	872.44	1157.56	P - y11+
P41222	PTGDS	TMLLQPAGSLGSYSYR	872.4404++	872.44	732.331	G - y6+
P41222	PTGDS	AQGFTEDTIVFLPQTDK	955.4807++	955.481	947.52	V - y8+
P41222	PTGDS	AQGFTEDTIVFLPQTDK	955.4807++	955.481	848.451	F - y7+
P41222	PTGDS	AQGFTEDTIVFLPQTDK	955.4807++	955.481	701.383	L - y6+
P41222	PTGDS	AQGFTEDTIVFLPQTDK	955.4807++	955.481	588.299	P - y5+
P41222	PTGDS	AQGFTEDTIVFLPQTDK	955.4807++	955.481	363.187	T - y3+
P04004	VTN	DVWGIEGPIDAAFTR	823.9123++	823.912	1076.54	E - y10+
P04004	VTN	DVWGIEGPIDAAFTR	823.9123++	823.912	947.495	G - y9+
P04004	VTN	DVWGIEGPIDAAFTR	823.9123++	823.912	890.473	P - y8+
P04004	VTN	DVWGIEGPIDAAFTR	823.9123++	823.912	565.309	A - y5+
P04004	VTN	FEDGVLDPDYPR	711.8304++	711.83	875.426	L - y7+
P04004	VTN	FEDGVLDPDYPR	711.8304++	711.83	762.342	D - y6+
P04004	VTN	FEDGVLDPDYPR	711.8304++	711.83	647.315	P - y5+
P04004	VTN	SIAQYWLGCPAPGHL	835.4114++	835.411	1270.6	Y - y11+
P04004	VTN	SIAQYWLGCPAPGHL	835.4114++	835.411	1107.54	W - y10+
P04004	VTN	SIAQYWLGCPAPGHL	835.4114++	835.411	921.461	L - y9+
P04004	VTN	SIAQYWLGCPAPGHL	835.4114++	835.411	808.377	G - y8+
P04004	VTN	SIAQYWLGCPAPGHL	835.4114++	835.411	751.356	C - y7+
P04004	VTN	SIAQYWLGCPAPGHL	835.4114++	835.411	591.325	P - y6+
P04004	VTN	SIAQYWLGCPAPGHL	835.4114++	835.411	423.235	P - y4+
P01024	C3	LVAYYTLIGASGQR	756.4145++	756.414	1065.57	Y - y10+
P01024	C3	LVAYYTLIGASGQR	756.4145++	756.414	902.505	T - y9+
P01024	C3	LVAYYTLIGASGQR	756.4145++	756.414	575.29	G - y6+
P01024	C3	LVAYYTLIGASGQR	756.4145++	756.414	447.231	S - y4+
P01024	C3	TGLQEVEVK	501.7769++	501.777	603.335	E - y5+
P01024	C3	TGLQEVEVK	501.7769++	501.777	474.292	V - y4+
P01024	C3	TGLQEVEVK	501.7769++	501.777	375.224	E - y3+
P01024	C3	SGSDEVQVGQQR	645.3077++	645.308	943.496	E - y8+
P01024	C3	SGSDEVQVGQQR	645.3077++	645.308	814.453	V - y7+
P01024	C3	SGSDEVQVGQQR	645.3077++	645.308	715.385	Q - y6+
P01024	C3	SGSDEVQVGQQR	645.3077++	645.308	587.326	V - y5+
P01024	C3	SGSDEVQVGQQR	645.3077++	645.308	488.258	G - y4+
P02647	APOA1	DYVSQFEGSALGK	700.8383++	700.838	808.42	F - y8+
P02647	APOA1	DYVSQFEGSALGK	700.8383++	700.838	661.352	E - y7+
P02647	APOA1	DYVSQFEGSALGK	700.8383++	700.838	532.309	G - y6+
P02647	APOA1	DYVSQFEGSALGK	700.8383++	700.838	317.218	L - y3+
P02647	APOA1	LLDNWDSVTSTFSK	806.8963++	806.896	971.468	D - y9+
P02647	APOA1	LLDNWDSVTSTFSK	806.8963++	806.896	856.441	S - y8+
P02647	APOA1	LLDNWDSVTSTFSK	806.8963++	806.896	670.341	T - y6+
P02647	APOA1	LLDNWDSVTSTFSK	806.8963++	806.896	569.293	S - y5+
P02647	APOA1	LLDNWDSVTSTFSK	806.8963++	806.896	381.213	F - y3+
P02647	APOA1	ATEHLSTLSEK	608.3144++	608.314	777.435	L - y7+
P02647	APOA1	ATEHLSTLSEK	608.3144++	608.314	664.351	S - y6+
P02647	APOA1	ATEHLSTLSEK	608.3144++	608.314	577.319	T - y5+
P02647	APOA1	ATEHLSTLSEK	608.3144++	608.314	363.187	S - y3+
P02649	APOE	SELEEQLTPVAEETR	865.9258++	865.926	1272.64	E - y11+
P02649	APOE	SELEEQLTPVAEETR	865.9258++	865.926	1015.54	L - y9+
P02649	APOE	SELEEQLTPVAEETR	865.9258++	865.926	902.458	T - y8+
P02649	APOE	SELEEQLTPVAEETR	865.9258++	865.926	801.41	P - y7+
P02649	APOE	LGPLVEQGR	484.7798++	484.78	588.31	V - y5+
P02649	APOE	LGPLVEQGR	484.7798++	484.78	489.242	E - y4+
P02649	APOE	LGPLVEQGR	484.7798++	484.78	360.199	Q - y3+
P02649	APOE	AATVGSLAGQPLQER	749.4046++	749.405	1155.61	G - y11+
P02649	APOE	AATVGSLAGQPLQER	749.4046++	749.405	898.474	A - y8+
P02649	APOE	AATVGSLAGQPLQER	749.4046++	749.405	827.437	G - y7+
P02649	APOE	AATVGSLAGQPLQER	749.4046++	749.405	770.416	Q - y6+
P02649	APOE	AATVGSLAGQPLQER	749.4046++	749.405	642.357	P - y5+
