# Supplementary material for: Multiple Reaction Monitoring-Based Targeted Assays for the Validation of Protein Biomarkers in Brain Tumors
Source: Front Oncol. 2021 May 14;11:548243. doi: 10.3389/fonc.2021.548243 (PMC8162214; doi:10.3389/fonc.2021.548243)
Supplement: Supplementary file 7 [file Table_4.xlsx]

## Sheet: Consolidated
Sample Set	Protein Accession	Protein Name	Peptide
Meningioma tissue	P10909	Clusterin	EILSVDCSTNNPSQAK
	P10909		ELDESLQVAER
	P10909		LFDSDPITVTVPVEVSR
	P01034	Cystatin-C	LVGGPMDASVEEEGVR
	P01034		QIVAGVNYFLDVELGR
	P01034		TQPNLDNCPFHDQPHLK
	P08670	Vimentin	SLYASSPGGVYATR
	P08670		ILLAELEQLK
	P08670		LGDLYEEEMR
	P08670		FADLSEAANR
Glioma tissue	P04179	Superdioxide Dismutase	GDVTAQIALQPALK
	P04179		GELLEAIK
	P04179		AIWNVINWENVTER
	P04083	Annexin A1	GVDEATIIDILTK
	P04083		GLGTDEDTLIEILASR
	P04083		GTDVNVFNTILTTR
	P08670	Vimentin	SLYASSPGGVYATR
	P08670		ILLAELEQLK
	P08670		LGDLYEEEMR
	P08670		FADLSEAANR
	P08670		QVQSLTCEVDALK
	P08670		ETNLDSLPLVDTHSK
Medulloblastoma tissue	P11137	Microtubule associated Protein 2	TPGTPGTPSYPR
	P11137		VGSLDNAHHVPGGGNVK
	P11137		VDHGAEIITQSPGR
	Q13435	Splicing factor 3 subunit 2	VGEPVALSEEER
	Q13435		KPGDLSDELR
	Q13435		YGPPPSYPNLK
	P08670	Vimentin	SLYASSPGGVYATR
	P08670		ILLAELEQLK
	P08670		LGDLYEEEMR
	P08670		FADLSEAANR

## Sheet: Meningioma transition list
Protein Accession	Protein Gene	Peptide	Precursor	Precursor Mz	Product Mz	Transition
P10909	CLU	EILSVDCSTNNPSQAK	881.9174++	881.917	1320.58	V - y12+
P10909	CLU	EILSVDCSTNNPSQAK	881.9174++	881.917	1221.52	D - y11+
P10909	CLU	EILSVDCSTNNPSQAK	881.9174++	881.917	1106.49	C - y10+
P10909	CLU	EILSVDCSTNNPSQAK	881.9174++	881.917	530.293	P - y5+
P10909	CLU	ELDESLQVAER	644.8226++	644.823	802.442	S - y7+
P10909	CLU	ELDESLQVAER	644.8226++	644.823	715.41	L - y6+
P10909	CLU	ELDESLQVAER	644.8226++	644.823	602.326	Q - y5+
P10909	CLU	ELDESLQVAER	644.8226++	644.823	474.267	V - y4+
P10909	CLU	ELDESLQVAER	644.8226++	644.823	375.199	A - y3+
P10909	CLU	ELDESLQVAER	644.8226++	644.823	358.208	L - y6++
P10909	CLU	LFDSDPITVTVPVEVSR	937.4989++	937.499	1296.75	P - y12+
P10909	CLU	LFDSDPITVTVPVEVSR	937.4989++	937.499	1086.62	T - y10+
P10909	CLU	LFDSDPITVTVPVEVSR	937.4989++	937.499	985.568	V - y9+
P10909	CLU	LFDSDPITVTVPVEVSR	937.4989++	937.499	886.499	T - y8+
P10909	CLU	LFDSDPITVTVPVEVSR	937.4989++	937.499	785.452	V - y7+
P10909	CLU	LFDSDPITVTVPVEVSR	937.4989++	937.499	686.383	P - y6+
P10909	CLU	LFDSDPITVTVPVEVSR	937.4989++	937.499	361.219	V - y3+
P10909	CLU	LFDSDPITVTVPVEVSR	937.4989++	937.499	706.393	D - y13++
P10909	CLU	LFDSDPITVTVPVEVSR	937.4989++	937.499	648.88	P - y12++
P10909	CLU	LFDSDPITVTVPVEVSR	937.4989++	937.499	393.229	V - y7++
P10909	CLU	LFDSDPITVTVPVEVSR	937.4989++	937.499	181.113	V - y3++
P01034	CST3	LVGGPMDASVEEEGVR	822.8985++	822.899	975.474	A - y9+
P01034	CST3	LVGGPMDASVEEEGVR	822.8985++	822.899	904.437	S - y8+
P01034	CST3	LVGGPMDASVEEEGVR	822.8985++	822.899	817.405	V - y7+
P01034	CST3	LVGGPMDASVEEEGVR	822.8985++	822.899	589.294	E - y5+
P01034	CST3	LVGGPMDASVEEEGVR	822.8985++	822.899	460.251	E - y4+
P01034	CST3	LVGGPMDASVEEEGVR	822.8985++	822.899	331.209	G - y3+
P01034	CST3	LVGGPMDASVEEEGVR	822.8985++	822.899	659.801	P - y12++
P01034	CST3	LVGGPMDASVEEEGVR	822.8985++	822.899	611.274	M - y11++
P01034	CST3	LVGGPMDASVEEEGVR	822.8985++	822.899	488.241	A - y9++
P01034	CST3	LVGGPMDASVEEEGVR	822.8985++	822.899	409.206	V - y7++
P01034	CST3	LVGGPMDASVEEEGVR	822.8985++	822.899	295.151	E - y5++
P01034	CST3	LVGGPMDASVEEEGVR	822.8985++	822.899	230.629	E - y4++
P01034	CST3	LVGGPMDASVEEEGVR	822.8985++	822.899	166.108	G - y3++
P01034	CST3	QIVAGVNYFLDVELGR	896.9832++	896.983	345.224	L - y3+
P01034	CST3	QIVAGVNYFLDVELGR	896.9832++	896.983	691.359	G - y12++
P01034	CST3	QIVAGVNYFLDVELGR	896.9832++	896.983	556.293	Y - y9++
P01034	CST3	QIVAGVNYFLDVELGR	896.9832++	896.983	474.761	F - y8++
P01034	CST3	QIVAGVNYFLDVELGR	896.9832++	896.983	401.227	L - y7++
P01034	CST3	QIVAGVNYFLDVELGR	896.9832++	896.983	287.171	V - y5++
P01034	CST3	QIVAGVNYFLDVELGR	896.9832++	896.983	173.116	L - y3++
P01034	CST3	TQPNLDNCPFHDQPHLK	1030.9840++	1030.98	1118.57	P - y9+
P01034	CST3	TQPNLDNCPFHDQPHLK	1030.9840++	1030.98	1021.52	F - y8+
P01034	CST3	TQPNLDNCPFHDQPHLK	1030.9840++	1030.98	874.453	H - y7+
P01034	CST3	TQPNLDNCPFHDQPHLK	1030.9840++	1030.98	622.367	Q - y5+
P01034	CST3	TQPNLDNCPFHDQPHLK	1030.9840++	1030.98	494.309	P - y4+
P01034	CST3	TQPNLDNCPFHDQPHLK	1030.9840++	1030.98	397.256	H - y3+
P01034	CST3	TQPNLDNCPFHDQPHLK	1030.9840++	1030.98	916.431	P - y15++
P01034	CST3	TQPNLDNCPFHDQPHLK	1030.9840++	1030.98	511.264	F - y8++
P01034	CST3	TQPNLDNCPFHDQPHLK	1030.9840++	1030.98	369.201	D - y6++
P01034	CST3	TQPNLDNCPFHDQPHLK	1030.9840++	1030.98	199.132	H - y3++
P08670	VIM	SLYASSPGGVYATR	714.8595++	714.86	994.495	S - y10+
P08670	VIM	SLYASSPGGVYATR	714.8595++	714.86	907.463	S - y9+
P08670	VIM	SLYASSPGGVYATR	714.8595++	714.86	820.431	P - y8+
P08670	VIM	SLYASSPGGVYATR	714.8595++	714.86	723.378	G - y7+
P08670	VIM	SLYASSPGGVYATR	714.8595++	714.86	609.335	V - y5+
P08670	VIM	SLYASSPGGVYATR	714.8595++	714.86	510.267	Y - y4+
P08670	VIM	SLYASSPGGVYATR	714.8595++	714.86	347.204	A - y3+
P08670	VIM	SLYASSPGGVYATR	714.8595++	714.86	454.235	S - y9++
P08670	VIM	SLYASSPGGVYATR	714.8595++	714.86	362.193	G - y7++
P08670	VIM	SLYASSPGGVYATR	714.8595++	714.86	305.171	V - y5++
P08670	VIM	SLYASSPGGVYATR	714.8595++	714.86	174.106	A - y3++
P08670	VIM	ILLAELEQLK	585.3606++	585.361	759.425	E - y6+
P08670	VIM	ILLAELEQLK	585.3606++	585.361	630.382	L - y5+
P08670	VIM	ILLAELEQLK	585.3606++	585.361	517.298	E - y4+
P08670	VIM	ILLAELEQLK	585.3606++	585.361	388.255	Q - y3+
P08670	VIM	ILLAELEQLK	585.3606++	585.361	380.216	E - y6++
P08670	VIM	ILLAELEQLK	585.3606++	585.361	315.695	L - y5++
P08670	VIM	ILLAELEQLK	585.3606++	585.361	259.153	E - y4++
P08670	VIM	ILLAELEQLK	585.3606++	585.361	194.631	Q - y3++
P08670	VIM	LGDLYEEEMR	627.7872++	627.787	856.351	Y - y6+
P08670	VIM	LGDLYEEEMR	627.7872++	627.787	693.287	E - y5+
P08670	VIM	LGDLYEEEMR	627.7872++	627.787	564.245	E - y4+
P08670	VIM	LGDLYEEEMR	627.7872++	627.787	435.202	E - y3+
P08670	VIM	LGDLYEEEMR	627.7872++	627.787	428.679	Y - y6++
P08670	VIM	LGDLYEEEMR	627.7872++	627.787	347.147	E - y5++
P08670	VIM	LGDLYEEEMR	627.7872++	627.787	218.105	E - y3++
P08670	VIM	FADLSEAANR	547.2673++	547.267	647.311	S - y6+
P08670	VIM	FADLSEAANR	547.2673++	547.267	560.279	E - y5+
P08670	VIM	FADLSEAANR	547.2673++	547.267	431.236	A - y4+
P08670	VIM	FADLSEAANR	547.2673++	547.267	360.199	A - y3+
P08670	VIM	FADLSEAANR	547.2673++	547.267	324.159	S - y6++
P08670	VIM	FADLSEAANR	547.2673++	547.267	216.122	A - y4++

## Sheet: Glioma transition list
Protein Accession	Protein Gene	Peptide	Precursor	Precursor Mz	Product Mz	Transition
P04179	SOD2	GDVTAQIALQPALK	712.9090++	712.909	1052.65	A - y10+
P04179	SOD2	GDVTAQIALQPALK	712.9090++	712.909	981.609	Q - y9+
P04179	SOD2	GDVTAQIALQPALK	712.9090++	712.909	853.551	I - y8+
P04179	SOD2	GDVTAQIALQPALK	712.9090++	712.909	740.467	A - y7+
P04179	SOD2	GDVTAQIALQPALK	712.9090++	712.909	669.429	L - y6+
P04179	SOD2	GDVTAQIALQPALK	712.9090++	712.909	556.345	Q - y5+
P04179	SOD2	GDVTAQIALQPALK	712.9090++	712.909	428.287	P - y4+
P04179	SOD2	GDVTAQIALQPALK	712.9090++	712.909	214.647	P - y4++
P04179	SOD2	GDVTAQIALQPALK	712.9090++	712.909	166.121	A - y3++
P04179	SOD2	GELLEAIK	436.7580++	436.758	460.277	E - y4+
P04179	SOD2	GELLEAIK	436.7580++	436.758	331.234	A - y3+
P04179	SOD2	GELLEAIK	436.7580++	436.758	230.642	E - y4++
P04179	SOD2	GELLEAIK	436.7580++	436.758	166.121	A - y3++
P04179	SOD2	AIWNVINWENVTER	872.4443++	872.444	1259.64	V - y10+
P04179	SOD2	AIWNVINWENVTER	872.4443++	872.444	1160.57	I - y9+
P04179	SOD2	AIWNVINWENVTER	872.4443++	872.444	1047.49	N - y8+
P04179	SOD2	AIWNVINWENVTER	872.4443++	872.444	933.442	W - y7+
P04179	SOD2	AIWNVINWENVTER	872.4443++	872.444	747.363	E - y6+
P04179	SOD2	AIWNVINWENVTER	872.4443++	872.444	618.321	N - y5+
P04179	SOD2	AIWNVINWENVTER	872.4443++	872.444	504.278	V - y4+
P04179	SOD2	AIWNVINWENVTER	872.4443++	872.444	405.209	T - y3+
P04179	SOD2	AIWNVINWENVTER	872.4443++	872.444	630.323	V - y10++
P04083	ANXA1	GVDEATIIDILTK	694.3876++	694.388	702.44	I - y6+
P04083	ANXA1	GVDEATIIDILTK	694.3876++	694.388	589.356	D - y5+
P04083	ANXA1	GVDEATIIDILTK	694.3876++	694.388	474.329	I - y4+
P04083	ANXA1	GVDEATIIDILTK	694.3876++	694.388	361.245	L - y3+
P04083	ANXA1	GVDEATIIDILTK	694.3876++	694.388	181.126	L - y3++
P04083	ANXA1	GLGTDEDTLIEILASR	851.9465++	851.947	1259.68	E - y11+
P04083	ANXA1	GLGTDEDTLIEILASR	851.9465++	851.947	1130.64	D - y10+
P04083	ANXA1	GLGTDEDTLIEILASR	851.9465++	851.947	1015.61	T - y9+
P04083	ANXA1	GLGTDEDTLIEILASR	851.9465++	851.947	801.483	I - y7+
P04083	ANXA1	GLGTDEDTLIEILASR	851.9465++	851.947	688.399	E - y6+
P04083	ANXA1	GLGTDEDTLIEILASR	851.9465++	851.947	446.272	L - y4+
P04083	ANXA1	GLGTDEDTLIEILASR	851.9465++	851.947	333.188	A - y3+
P04083	ANXA1	GLGTDEDTLIEILASR	851.9465++	851.947	687.859	D - y12++
P04083	ANXA1	GTDVNVFNTILTTR	775.9123++	775.912	1064.61	V - y9+
P04083	ANXA1	GTDVNVFNTILTTR	775.9123++	775.912	965.541	F - y8+
P04083	ANXA1	GTDVNVFNTILTTR	775.9123++	775.912	818.473	N - y7+
P04083	ANXA1	GTDVNVFNTILTTR	775.9123++	775.912	490.298	L - y4+
P04083	ANXA1	GTDVNVFNTILTTR	775.9123++	775.912	377.214	T - y3+
P08670	VIM	SLYASSPGGVYATR	714.8595++	714.86	994.495	S - y10+
P08670	VIM	SLYASSPGGVYATR	714.8595++	714.86	907.463	S - y9+
P08670	VIM	SLYASSPGGVYATR	714.8595++	714.86	820.431	P - y8+
P08670	VIM	SLYASSPGGVYATR	714.8595++	714.86	723.378	G - y7+
P08670	VIM	SLYASSPGGVYATR	714.8595++	714.86	666.357	G - y6+
P08670	VIM	SLYASSPGGVYATR	714.8595++	714.86	609.335	V - y5+
P08670	VIM	SLYASSPGGVYATR	714.8595++	714.86	510.267	Y - y4+
P08670	VIM	SLYASSPGGVYATR	714.8595++	714.86	347.204	A - y3+
P08670	VIM	SLYASSPGGVYATR	714.8595++	714.86	497.751	S - y10++
P08670	VIM	SLYASSPGGVYATR	714.8595++	714.86	454.235	S - y9++
P08670	VIM	SLYASSPGGVYATR	714.8595++	714.86	410.719	P - y8++
P08670	VIM	SLYASSPGGVYATR	714.8595++	714.86	362.193	G - y7++
P08670	VIM	SLYASSPGGVYATR	714.8595++	714.86	305.171	V - y5++
P08670	VIM	SLYASSPGGVYATR	714.8595++	714.86	255.637	Y - y4++
P08670	VIM	ILLAELEQLK	585.3606++	585.361	759.425	E - y6+
P08670	VIM	ILLAELEQLK	585.3606++	585.361	630.382	L - y5+
P08670	VIM	ILLAELEQLK	585.3606++	585.361	517.298	E - y4+
P08670	VIM	ILLAELEQLK	585.3606++	585.361	388.255	Q - y3+
P08670	VIM	ILLAELEQLK	585.3606++	585.361	380.216	E - y6++
P08670	VIM	ILLAELEQLK	585.3606++	585.361	315.695	L - y5++
P08670	VIM	ILLAELEQLK	585.3606++	585.361	259.153	E - y4++
P08670	VIM	LGDLYEEEMR	627.7872++	627.787	856.351	Y - y6+
P08670	VIM	LGDLYEEEMR	627.7872++	627.787	693.287	E - y5+
P08670	VIM	LGDLYEEEMR	627.7872++	627.787	564.245	E - y4+
P08670	VIM	LGDLYEEEMR	627.7872++	627.787	435.202	E - y3+
P08670	VIM	LGDLYEEEMR	627.7872++	627.787	428.679	Y - y6++
P08670	VIM	LGDLYEEEMR	627.7872++	627.787	347.147	E - y5++
P08670	VIM	LGDLYEEEMR	627.7872++	627.787	282.626	E - y4++
P08670	VIM	LGDLYEEEMR	627.7872++	627.787	218.105	E - y3++
P08670	VIM	FADLSEAANR	547.2673++	547.267	647.311	S - y6+
P08670	VIM	FADLSEAANR	547.2673++	547.267	560.279	E - y5+
P08670	VIM	FADLSEAANR	547.2673++	547.267	431.236	A - y4+
P08670	VIM	FADLSEAANR	547.2673++	547.267	360.199	A - y3+
P08670	VIM	FADLSEAANR	547.2673++	547.267	324.159	S - y6++
P08670	VIM	FADLSEAANR	547.2673++	547.267	216.122	A - y4++
P08670	VIM	QVQSLTCEVDALK	745.8796++	745.88	1048.53	L - y9+
P08670	VIM	QVQSLTCEVDALK	745.8796++	745.88	935.45	T - y8+
P08670	VIM	QVQSLTCEVDALK	745.8796++	745.88	834.403	C - y7+
P08670	VIM	QVQSLTCEVDALK	745.8796++	745.88	674.372	E - y6+
P08670	VIM	QVQSLTCEVDALK	745.8796++	745.88	545.329	V - y5+
P08670	VIM	QVQSLTCEVDALK	745.8796++	745.88	446.261	D - y4+
P08670	VIM	QVQSLTCEVDALK	745.8796++	745.88	331.234	A - y3+
P08670	VIM	QVQSLTCEVDALK	745.8796++	745.88	468.229	T - y8++
P08670	VIM	QVQSLTCEVDALK	745.8796++	745.88	417.705	C - y7++
P08670	VIM	QVQSLTCEVDALK	745.8796++	745.88	337.69	E - y6++
P08670	VIM	QVQSLTCEVDALK	745.8796++	745.88	273.168	V - y5++
P08670	VIM	QVQSLTCEVDALK	745.8796++	745.88	166.121	A - y3++
P08670	VIM	ETNLDSLPLVDTHSK	834.9256++	834.926	1211.63	D - y11+
P08670	VIM	ETNLDSLPLVDTHSK	834.9256++	834.926	1096.6	S - y10+
P08670	VIM	ETNLDSLPLVDTHSK	834.9256++	834.926	1009.57	L - y9+
P08670	VIM	ETNLDSLPLVDTHSK	834.9256++	834.926	896.484	P - y8+
P08670	VIM	ETNLDSLPLVDTHSK	834.9256++	834.926	799.431	L - y7+
P08670	VIM	ETNLDSLPLVDTHSK	834.9256++	834.926	686.347	V - y6+
P08670	VIM	ETNLDSLPLVDTHSK	834.9256++	834.926	587.278	D - y5+
P08670	VIM	ETNLDSLPLVDTHSK	834.9256++	834.926	472.251	T - y4+
P08670	VIM	ETNLDSLPLVDTHSK	834.9256++	834.926	371.204	H - y3+
P08670	VIM	ETNLDSLPLVDTHSK	834.9256++	834.926	606.317	D - y11++
P08670	VIM	ETNLDSLPLVDTHSK	834.9256++	834.926	548.803	S - y10++
P08670	VIM	ETNLDSLPLVDTHSK	834.9256++	834.926	448.745	P - y8++
P08670	VIM	ETNLDSLPLVDTHSK	834.9256++	834.926	400.219	L - y7++
P08670	VIM	ETNLDSLPLVDTHSK	834.9256++	834.926	343.677	V - y6++
P08670	VIM	ETNLDSLPLVDTHSK	834.9256++	834.926	294.143	D - y5++
P08670	VIM	ETNLDSLPLVDTHSK	834.9256++	834.926	186.106	H - y3++

## Sheet: Medulloblastoma transition list
Protein Accession	Protein Gene	Peptide	Precursor	Precursor Mz	Product Mz	Transition
P11137	MAP2	TPGTPGTPSYPR	615.8093++	615.809	874.442	P - y8+
P11137	MAP2	TPGTPGTPSYPR	615.8093++	615.809	777.389	G - y7+
P11137	MAP2	TPGTPGTPSYPR	615.8093++	615.809	720.368	T - y6+
P11137	MAP2	TPGTPGTPSYPR	615.8093++	615.809	619.32	P - y5+
P11137	MAP2	TPGTPGTPSYPR	615.8093++	615.809	522.267	S - y4+
P11137	MAP2	TPGTPGTPSYPR	615.8093++	615.809	437.725	P - y8++
P11137	MAP2	VGSLDNAHHVPGGGNVK	829.4239++	829.424	628.341	P - y7+
P11137	MAP2	VGSLDNAHHVPGGGNVK	829.4239++	829.424	474.267	G - y5+
P11137	MAP2	VGSLDNAHHVPGGGNVK	829.4239++	829.424	651.321	D - y13++
P11137	MAP2	VGSLDNAHHVPGGGNVK	829.4239++	829.424	501.267	H - y10++
P11137	MAP2	VGSLDNAHHVPGGGNVK	829.4239++	829.424	209.126	G - y4++
P11137	MAP2	VGSLDNAHHVPGGGNVK	829.4239++	829.424	180.616	N - y3++
P11137	MAP2	VDHGAEIITQSPGR	740.3812++	740.381	544.284	Q - y5+
P11137	MAP2	VDHGAEIITQSPGR	740.3812++	740.381	329.193	P - y3+
P11137	MAP2	VDHGAEIITQSPGR	740.3812++	740.381	436.253	I - y8++
P11137	MAP2	VDHGAEIITQSPGR	740.3812++	740.381	323.169	T - y6++
Q13435	SF3B2	VGEPVALSEEER	657.8304++	657.83	649.279	S - y5+
Q13435	SF3B2	VGEPVALSEEER	657.8304++	657.83	562.247	E - y4+
Q13435	SF3B2	VGEPVALSEEER	657.8304++	657.83	515.264	P - y9++
Q13435	SF3B2	VGEPVALSEEER	657.8304++	657.83	417.204	A - y7++
Q13435	SF3B2	VGEPVALSEEER	657.8304++	657.83	381.685	L - y6++
Q13435	SF3B2	VGEPVALSEEER	657.8304++	657.83	325.143	S - y5++
Q13435	SF3B2	VGEPVALSEEER	657.8304++	657.83	217.106	E - y3++
Q13435	SF3B2	KPGDLSDELR	565.2960++	565.296	532.273	D - y4+
Q13435	SF3B2	KPGDLSDELR	565.2960++	565.296	417.246	E - y3+
Q13435	SF3B2	KPGDLSDELR	565.2960++	565.296	501.249	P - y9++
Q13435	SF3B2	KPGDLSDELR	565.2960++	565.296	209.126	E - y3++
Q13435	SF3B2	YGPPPSYPNLK	616.8191++	616.819	915.493	P - y8+
Q13435	SF3B2	YGPPPSYPNLK	616.8191++	616.819	818.441	P - y7+
Q13435	SF3B2	YGPPPSYPNLK	616.8191++	616.819	634.356	Y - y5+
Q13435	SF3B2	YGPPPSYPNLK	616.8191++	616.819	506.777	P - y9++
Q13435	SF3B2	YGPPPSYPNLK	616.8191++	616.819	409.724	P - y7++
P08670	VIM	SLYASSPGGVYATR	714.8595++	714.86	994.495	S - y10+
P08670	VIM	SLYASSPGGVYATR	714.8595++	714.86	907.463	S - y9+
P08670	VIM	SLYASSPGGVYATR	714.8595++	714.86	820.431	P - y8+
P08670	VIM	SLYASSPGGVYATR	714.8595++	714.86	723.378	G - y7+
P08670	VIM	SLYASSPGGVYATR	714.8595++	714.86	609.335	V - y5+
P08670	VIM	SLYASSPGGVYATR	714.8595++	714.86	510.267	Y - y4+
P08670	VIM	SLYASSPGGVYATR	714.8595++	714.86	347.204	A - y3+
P08670	VIM	SLYASSPGGVYATR	714.8595++	714.86	410.719	P - y8++
P08670	VIM	ILLAELEQLK	585.3606++	585.361	759.425	E - y6+
P08670	VIM	ILLAELEQLK	585.3606++	585.361	630.382	L - y5+
P08670	VIM	ILLAELEQLK	585.3606++	585.361	517.298	E - y4+
P08670	VIM	ILLAELEQLK	585.3606++	585.361	388.255	Q - y3+
P08670	VIM	ILLAELEQLK	585.3606++	585.361	380.216	E - y6++
P08670	VIM	LGDLYEEEMR	627.7872++	627.787	856.351	Y - y6+
P08670	VIM	LGDLYEEEMR	627.7872++	627.787	693.287	E - y5+
P08670	VIM	LGDLYEEEMR	627.7872++	627.787	564.245	E - y4+
P08670	VIM	LGDLYEEEMR	627.7872++	627.787	435.202	E - y3+
P08670	VIM	FADLSEAANR	547.2673++	547.267	647.311	S - y6+
P08670	VIM	FADLSEAANR	547.2673++	547.267	560.279	E - y5+
P08670	VIM	FADLSEAANR	547.2673++	547.267	431.236	A - y4+
P08670	VIM	FADLSEAANR	547.2673++	547.267	360.199	A - y3+
